# Supplementary material
Source: publisher site journal article supplement (https://www.spandidos-publications.com/3686/downloadSupplementary)

Figure S1. NEDD4 mRNA expression in different cells lines, as determined by reverse transcription-quantitative PCR. \*\*\*P<0.001 vs. the NC group. NC, cells treated with culture medium; si-NC, cells transfected with si-NC; si-NEDD4, cells transfected with si-NEDD4. NC, negative control; siRNA/si, small interfering RNA; NEDD4, NEDD4 E3 ubiquitin protein ligase.

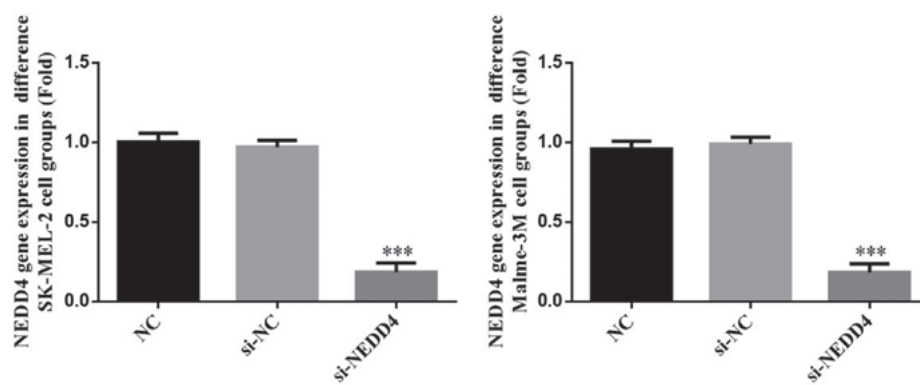

Supplement: Supplementary file 1 [file downloadSupplementary]
